# Supplementary material for: Lifestyle risk behaviours among adolescents: a two-year longitudinal study of the impact of the COVID-19 pandemic
Source: PubMed Central journal article supplement — BMJ Open. 2022 May 19;12(6):e060309. doi: 10.1136/bmjopen-2021-060309 (PMC9170793; doi:10.1136/bmjopen-2021-060309), 2022-05-19
Supplement: bmjopen-2021-060309supp001.pdf [file bmjopen-2021-060309supp001.pdf]

## Supplementary Material

**eTable 1. Prevalence ratios with 95% confidence intervals for the change in lifestyle risk behaviours over time and by lockdown status and gender**

|                         | High SSB intake      | High Discretionary food intake | Insufficient fruit intake | Insufficient vegetable intake | Insufficient sleep    | Excessive recreational screen time | Insufficient Physical activity | Alcohol use           | Tobacco use           |
|-------------------------|----------------------|--------------------------------|---------------------------|-------------------------------|-----------------------|------------------------------------|--------------------------------|-----------------------|-----------------------|
| <b>Change over time</b> | 0.83<br>(0.58-1.18)  | 0.97 (0.86-1.09)               | 1.50**<br>(1.26-1.79)     | 1.01 (0.97-1.06)              | 0.74**<br>(0.68-0.81) | 1.06**<br>(1.03-1.11)              | 1.03 (1.00-1.07)               | 4.34**<br>(2.82-6.67) | 4.05**<br>(1.86-8.84) |
| <b>Lockdown v not</b>   | 0.61*<br>(0.39-0.98) | 0.73** (0.64-0.83)             | 1.07 (0.82-1.40)          | 0.99 (0.90-1.09)              | 1.00 (0.84-1.19)      | 1.04 (0.97-1.11)                   | 1.04 (0.96-1.13)               | 1.66<br>(0.84-3.27)   | 0.37<br>(0.12-1.16)   |
| <b>Female v Male</b>    | 0.79<br>(0.46-1.36)  | 1.03 (0.80-1.33)               | 0.95 (0.78-1.16)          | 1.03 (1.00-1.13)              | 1.24**<br>(1.10-1.41) | 1.04 (0.99-1.09)                   | 1.03 (0.94-1.12)               | 2.34*<br>(1.19-4.62)  | 1.63<br>(0.55-4.88)   |

Note. SSB=sugar sweetened beverage, \*Indicates significance at p<0.05; \*\*indicates significance at p<0.001.
